# Supplementary material for: Mitochondrial uncoupling has no effect on microvascular complications in type 2 diabetes
Source: PubMed Central journal article supplement (PMC6351661; doi:10.1038/s41598-018-37376-y), 2019-01-29

# Mitochondrial uncoupling has no effect on microvascular complications in type 2 diabetes

## Supplementary Information

Lucy M. Hinder<sup>1</sup>, Kelli M. Sas<sup>2</sup>, Phillippe D. O'Brien<sup>1</sup>, Carey Backus<sup>1</sup>, Pradeep Kayampilly<sup>2</sup>, John M. Hayes<sup>1</sup>, Cheng-mao Lin<sup>3</sup>, Hongyu Zhang<sup>2</sup>, Sumathi Shanmugam<sup>3</sup>, Amy E. Rumora<sup>1</sup>, Steven F. Abcouwer<sup>3</sup>, Frank C. Brosius III<sup>2, 4</sup>, Subramaniam Pennathur<sup>2, 4</sup>, Eva L. Feldman<sup>1\*</sup>

<sup>1</sup>Department of Neurology, University of Michigan, Ann Arbor, MI 48109, USA

<sup>2</sup>Division of Nephrology, Department of Internal Medicine, University of Michigan, Ann Arbor, MI 48109, USA

<sup>3</sup>Department of Ophthalmology and Visual Sciences, University of Michigan, Ann Arbor, Michigan 48109

<sup>4</sup>Departments of Molecular and Integrative Physiology, University of Michigan, Ann Arbor, MI 48109

\*Corresponding author:

Eva L. Feldman, MD, PhD

Russell N. DeJong Professor of Neurology

5017 AATBSRB, 109 Zina Pitcher Place

Ann Arbor, MI 48109, United States

Phone: (734) 763-7274

Fax: (734) 763-7275

Email: [efeldman@umich.edu](mailto:efeldman@umich.edu)

## Supplementary Figures

**Supplementary Figure 1. Longitudinal Body Weight and Fasting Blood Glucose.** (a) Body weights were measured fortnightly from 12-24 wk. (b) Fasting blood glucose levels were measured at 16, 20 and 24 wk. Ctrl, mice fed a standard diet; NEN, mice fed niclosamide ethanolamine chow. \*,  $p < 0.05$ , \*\*,  $p < 0.01$ , *db/db* NEN vs. *db/db* Ctrl.

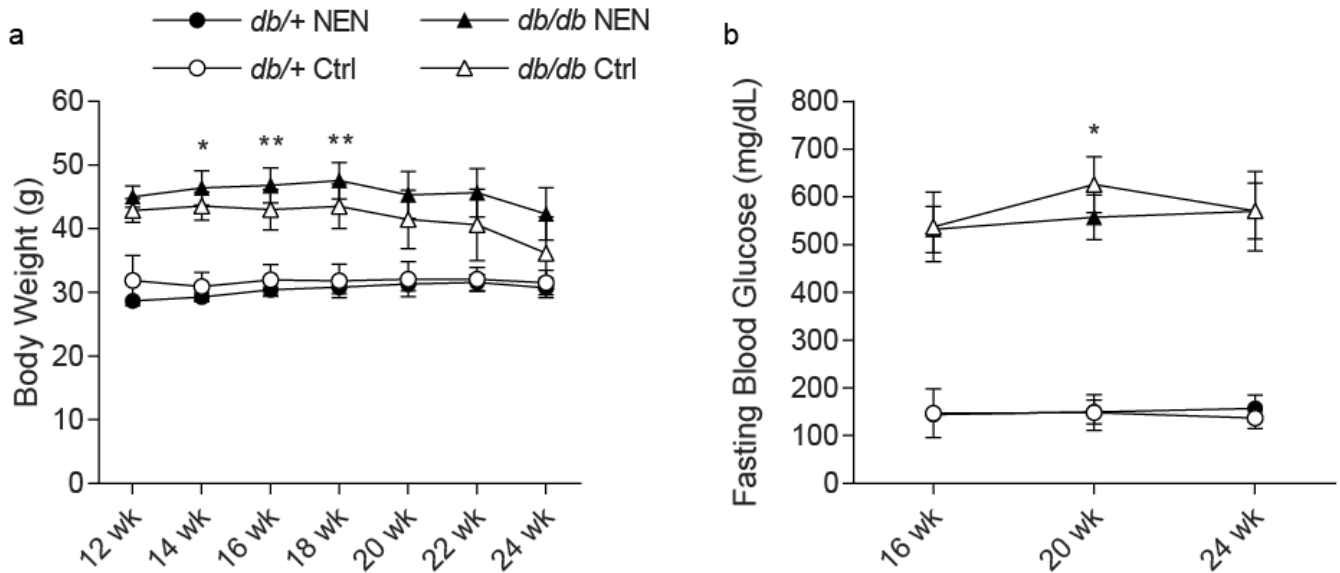

**Supplementary Figure 2. Diabetic Kidney Disease (DKD) Phenotyping.** (a) 24 h total urinary creatinine, (b) 24 h total urinary albumin, and (c) periodic acid-Schiff (PAS)-positive glomerular area were measured at 24 wk. Ctrl, mice fed a standard diet; NEN, mice fed niclosamide ethanolamine chow. \*,  $p < 0.05$ , \*\*\*,  $p < 0.001$

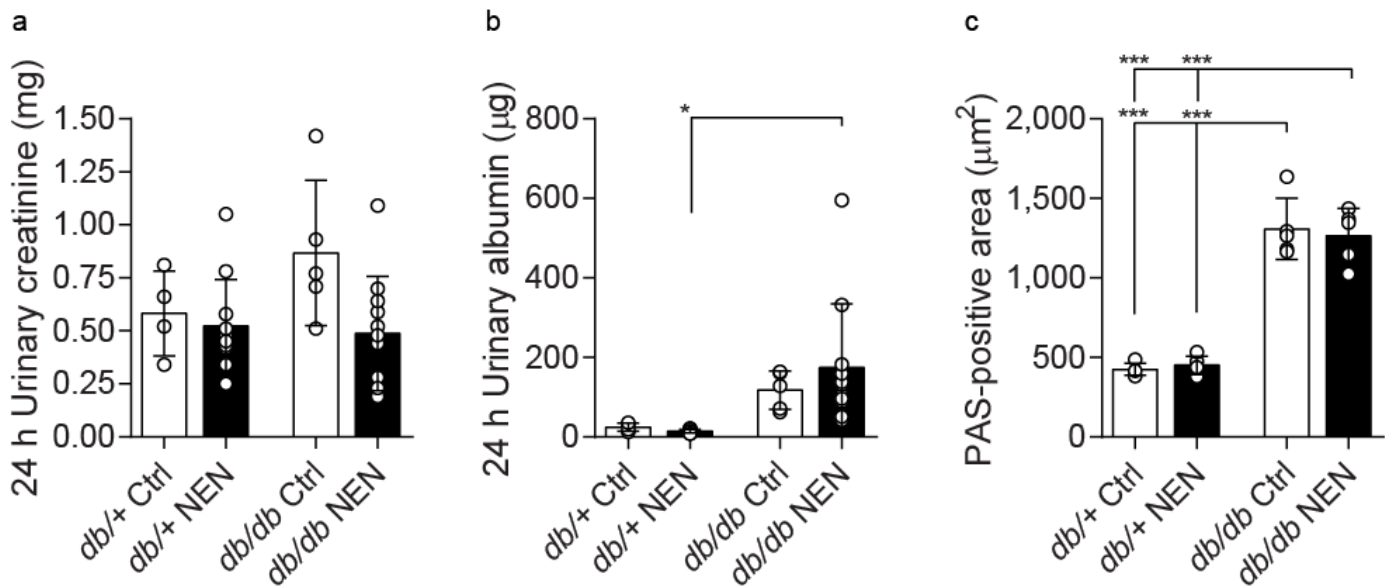

Supplement: 41598_2018_37376_MOESM1_ESM.pdf [file 41598_2018_37376_MOESM1_ESM.pdf]
